# Supplementary material
Source: PubMed Central journal article supplement (PMC2644344)

Figure S1

**A**

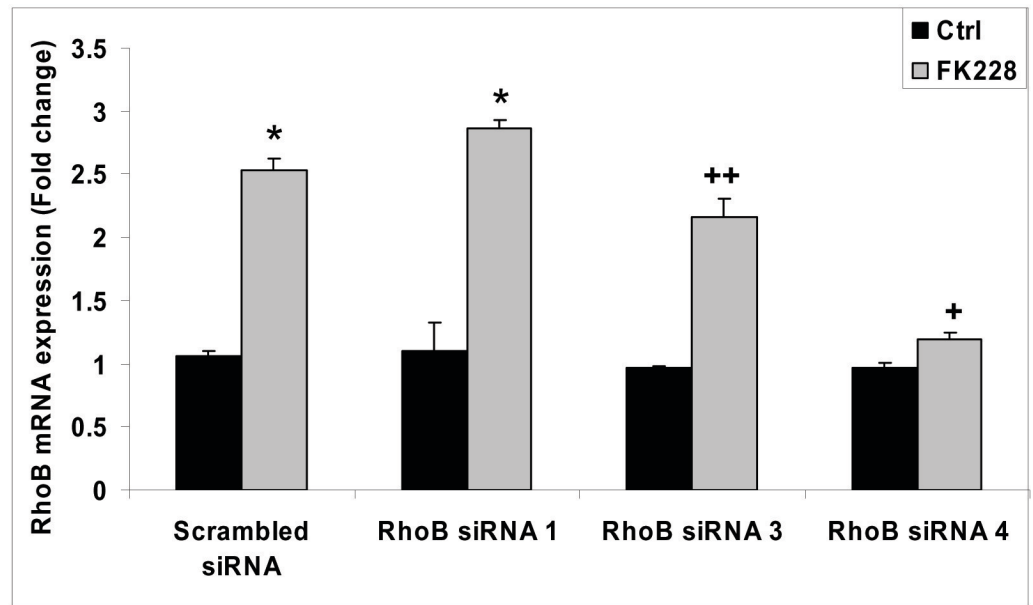

**B**

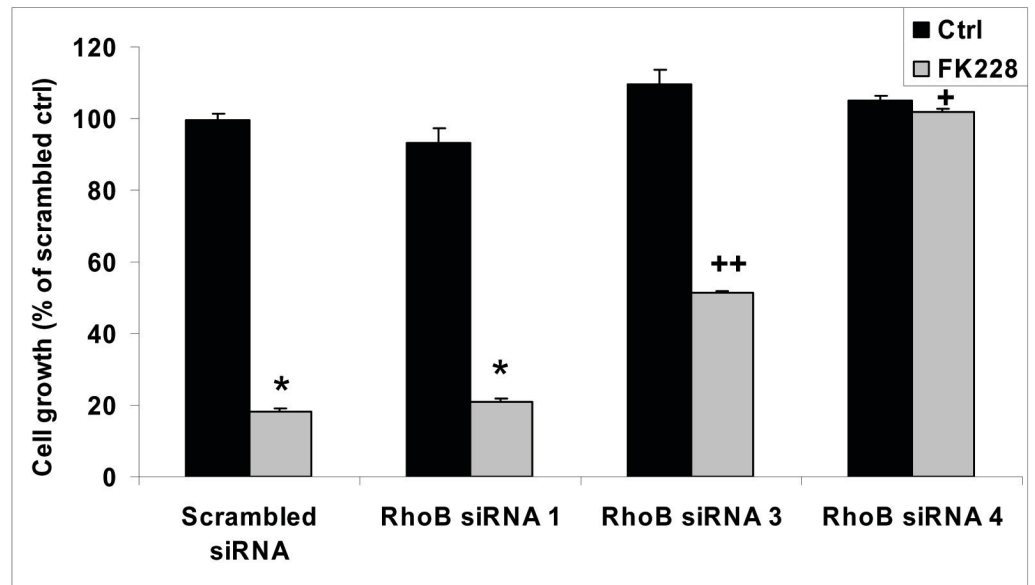

Supplement: NIHMS83531-supplement-S1.pdf [file NIHMS83531-supplement-S1.pdf]

Figure S3

**A**

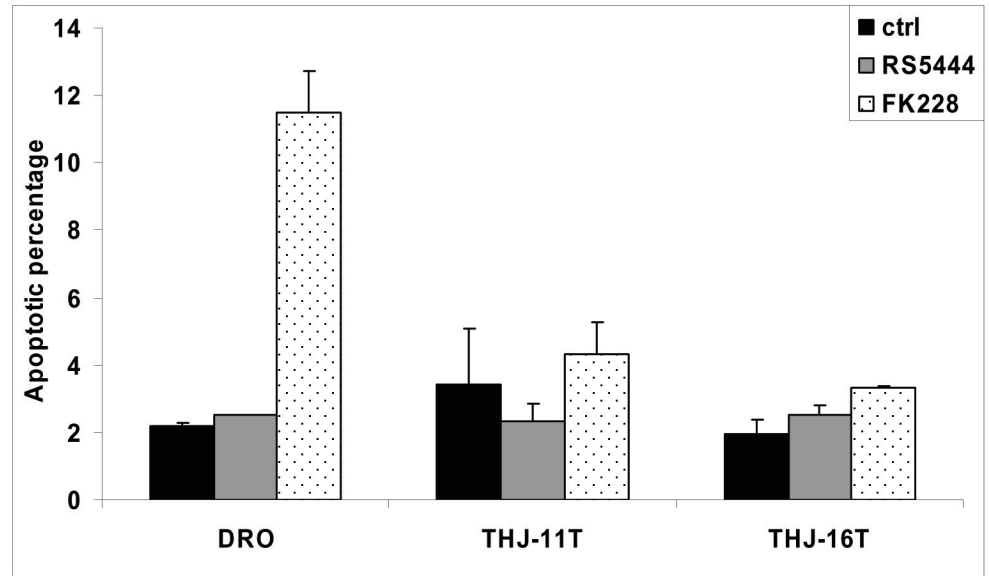

**B**

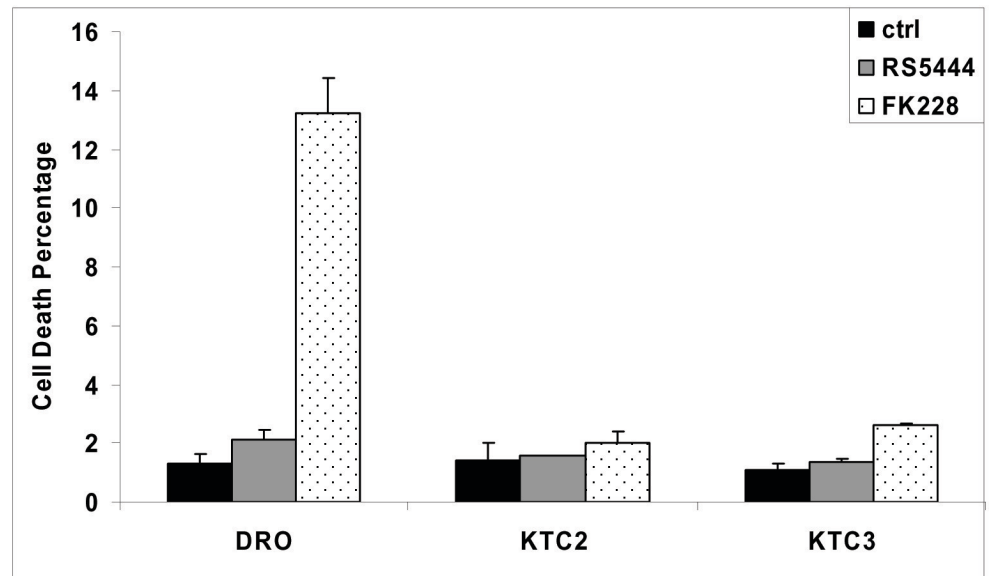

Supplement: NIHMS83531-supplement-S3.pdf [file NIHMS83531-supplement-S3.pdf]
